# Supplementary material for: Runoff component quantification and future streamflow projection in a large mountainous basin based on a multidata-constrained cryospheric–hydrological model
Source: Copernicus journal article supplement (doi:10.5194/hess-29-1033-2025), 2025-02-27
Supplement: Supplementary file 1 [file hess-29-1033-2025-supplement.pdf]

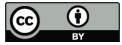

*Supplement of*

## **Runoff component quantification and future streamflow projection in a large mountainous basin based on a multidata-constrained cryospheric–hydrological model**

**Mengjiao Zhang et al.**

*Correspondence to:* Yi Nan (ny1209@qq.com) and Fuqiang Tian (tianfq@tsinghua.edu.cn)

The copyright of individual parts of the supplement might differ from the article licence.

# 1 Supplementary Tables and Figures

2 **Table S1** Calibrated parameters of the THREW model in this study.

| No. | Symbol  | Unit                                  | Description                                                                                                                                                                                                                                                                                                                                                                    | Range  |
|-----|---------|---------------------------------------|--------------------------------------------------------------------------------------------------------------------------------------------------------------------------------------------------------------------------------------------------------------------------------------------------------------------------------------------------------------------------------|--------|
| 1   | kv      | –                                     | Fraction of potential transpiration rate over potential evaporation                                                                                                                                                                                                                                                                                                            | 0~0.8  |
| 2   | nt      | –                                     | Manning roughness coefficient for hillslope                                                                                                                                                                                                                                                                                                                                    | 0~0.2  |
| 3   | GaIFL   | –                                     | Spatial heterogeneous coefficient of infiltration capacity                                                                                                                                                                                                                                                                                                                     | 0~0.7  |
| 4   | GaEFL   | –                                     | Spatial heterogeneous coefficient of exfiltration capacity                                                                                                                                                                                                                                                                                                                     | 0~0.7  |
| 5   | GaETL   | –                                     | Spatial heterogeneous coefficient of evapotranspiration capacity                                                                                                                                                                                                                                                                                                               | 0~0.7  |
| 6   | WM      | m                                     | Tension water storage capacity                                                                                                                                                                                                                                                                                                                                                 | 0~2    |
| 7   | B       | –                                     | Shape coefficient for calculating the saturation excess streamflow area                                                                                                                                                                                                                                                                                                        | 0~1    |
| 8   | Gatr    | –                                     | Coefficient representing spatial heterogeneity of exchange term between t-zone and r-zone                                                                                                                                                                                                                                                                                      | 0~10   |
| 9   | KKA     | –                                     | Coefficient to calculate subsurface runoff in $R_g = KKD \cdot S \cdot K_s^S \left(\frac{Z^S}{Z}\right)^{KKA}$ , where $S$ is the topographic slope, $K_s^S$ is the saturated hydraulic conductivity, $Z^S$ is the depth of saturated groundwater, $Z$ is the total soil depth                                                                                                 | 0~6    |
| 10  | KKD     | –                                     | See description for $KKA$                                                                                                                                                                                                                                                                                                                                                      | 0~0.5  |
| 11  | $C_1$   | –                                     | Coefficient to calculate the runoff concentration process using Muskingum method: $O_2 = C_1 \cdot I_1 + C_2 \cdot I_2 + C_3 \cdot O_1 + C_4 \cdot Q_{lat}$ , where $I_1$ and $O_1$ is the inflow and outflow at prior step, $I_2$ and $O_2$ is the inflow and outflow at current step, $Q_{lat}$ is lateral flow of the river channel, $C_3 = 1 - C_1 - C_2, C_4 = C_1 + C_2$ | 0~1    |
| 12  | $C_2$   | –                                     | See description for $C_1$                                                                                                                                                                                                                                                                                                                                                      | 0~1    |
| 13  | LL      | –                                     | cover area in $SCA = A \cdot \left(\frac{SWE}{WMAX}\right)^{LL}$                                                                                                                                                                                                                                                                                                               | 0~1    |
| 14  | $T_0$   | °C                                    | Temperature threshold above which snow and glacier melt                                                                                                                                                                                                                                                                                                                        | -5~5   |
| 15  | $T_1$   | °C                                    | Temperature threshold for separating rainfall and snowfall                                                                                                                                                                                                                                                                                                                     | -5~5   |
| 16  | $DDF_s$ | mm °C <sup>-1</sup> day <sup>-1</sup> | Degree day factor for snowmelt                                                                                                                                                                                                                                                                                                                                                 | 0~10   |
| 17  | $DDF_g$ | mm °C <sup>-1</sup> day <sup>-1</sup> | Degree day factor for glacier melt                                                                                                                                                                                                                                                                                                                                             | 0~10   |
| 18  | SHmax   | –                                     | Threshold for snow sublimation ratio                                                                                                                                                                                                                                                                                                                                           | 0~1    |
| 19  | SHsd    | mm                                    | Reference depth of snow sublimation                                                                                                                                                                                                                                                                                                                                            | 1.1~20 |

3 **Table S2** The optimal value of the THREW model parameters by various calibration variants,

| No. | Parameter | D           | DG    | DS    | DSG   | ALL   |         |         |       |
|-----|-----------|-------------|-------|-------|-------|-------|---------|---------|-------|
|     |           | Whole basin |       |       |       | Nuxia | Yangcun | Nugesha | Lazi  |
| 1   | kv        | 0.634       | 0.568 | 0.653 | 0.228 | 0.699 | 0.748   | 0.767   | 0.492 |
| 2   | nt        | 0.072       | 0.014 | 0.031 | 0.050 | 0.076 | 0.014   | 0.198   | 0.043 |
| 3   | GaIFL     | 0.169       | 0.174 | 0.138 | 0.328 | 0.618 | 0.288   | 0.311   | 0.005 |
| 4   | GaEFL     | 0.402       | 0.483 | 0.391 | 0.537 | 0.438 | 0.396   | 0.115   | 0.594 |
| 5   | GaETL     | 0.272       | 0.206 | 0.116 | 0.050 | 0.543 | 0.449   | 0.023   | 0.559 |
| 6   | WM        | 1.458       | 0.669 | 1.842 | 0.656 | 1.118 | 0.804   | 1.749   | 0.706 |
| 7   | B         | 0.866       | 0.510 | 0.351 | 0.726 | 0.284 | 0.535   | 0.466   | 0.956 |
| 8   | Gatr      | 3.120       | 2.566 | 4.213 | 2.536 | 5.649 | 4.007   | 7.280   | 8.136 |
| 9   | KKA       | 2.167       | 5.523 | 3.070 | 4.966 | 5.734 | 5.282   | 5.916   | 5.200 |

|    |                  |        |        |        |        |        |        |        |        |
|----|------------------|--------|--------|--------|--------|--------|--------|--------|--------|
| 10 | KKD              | 0.269  | 0.249  | 0.122  | 0.180  | 0.307  | 0.137  | 0.463  | 0.368  |
| 11 | C <sub>1</sub>   | 0.006  | 0.550  | 0.121  | 0.032  | 0.149  | 0.127  | 0.238  | 0.017  |
| 12 | C <sub>2</sub>   | 0.784  | 0.448  | 0.664  | 0.833  | 0.777  | 0.728  | 0.463  | 0.230  |
| 13 | LL               | 0.796  | 0.467  | 0.724  | 0.870  | 0.821  | 0.756  | 0.666  | 0.555  |
| 14 | T <sub>0</sub>   | -2.337 | -2.745 | -4.856 | -3.142 | -3.451 | -4.850 | -4.889 | -4.659 |
| 15 | T <sub>1</sub>   | 2.240  | 2.267  | -0.144 | 0.384  | -2.192 | 1.693  | -2.672 | 4.527  |
| 16 | DDF <sub>s</sub> | 4.188  | 7.725  | 7.901  | 8.383  | 4.799  | 8.760  | 8.440  | 3.903  |
| 17 | DDF <sub>g</sub> | 5.875  | 4.515  | 6.458  | 3.971  | 2.708  | 2.614  | 4.259  | 3.101  |
| 18 | SHmax            | 0.332  | 0.527  | 0.796  | 0.797  | 0.797  | 0.799  | 0.786  | 0.799  |
| 19 | SHsd             | 9.991  | 11.913 | 1.224  | 1.104  | 1.186  | 1.366  | 1.126  | 1.147  |

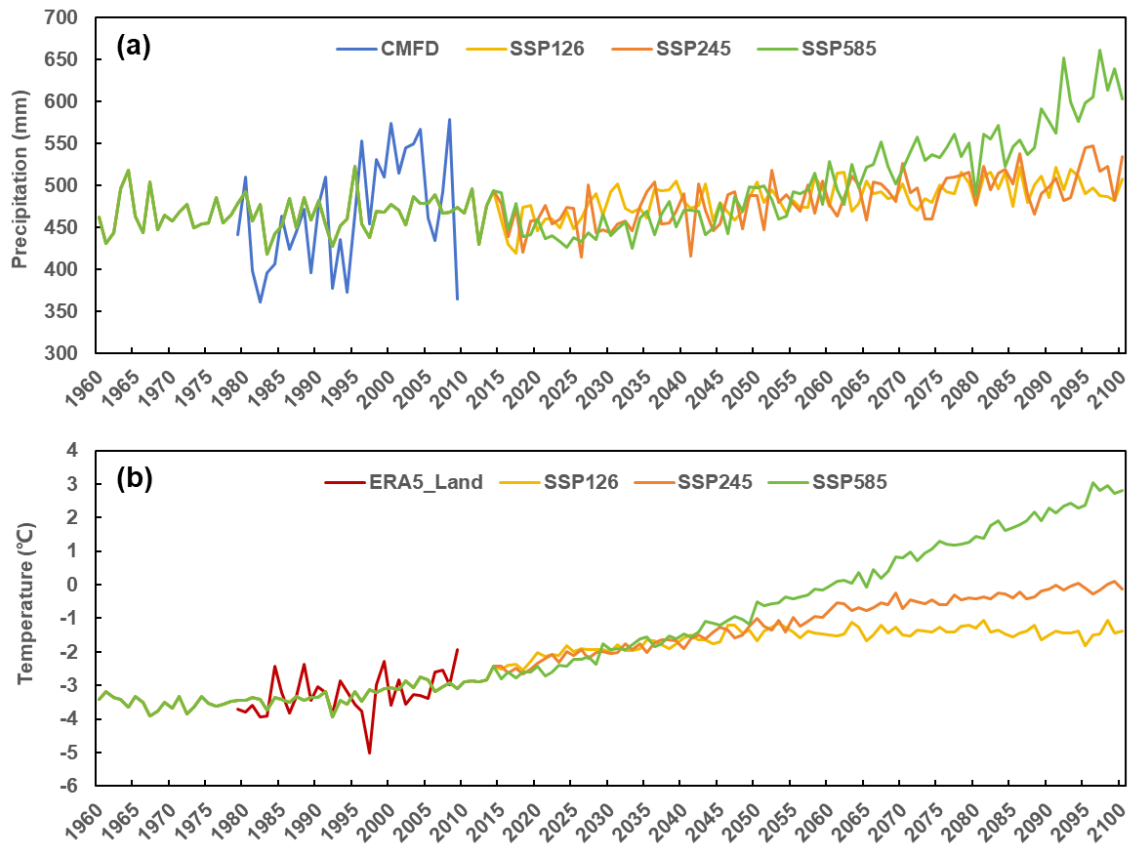

4

5

Figure S1 Average annual precipitation (a) and temperature (b) of 10 bias-corrected CMIP6 GCMs during 1960–2100 in the YTR basin.

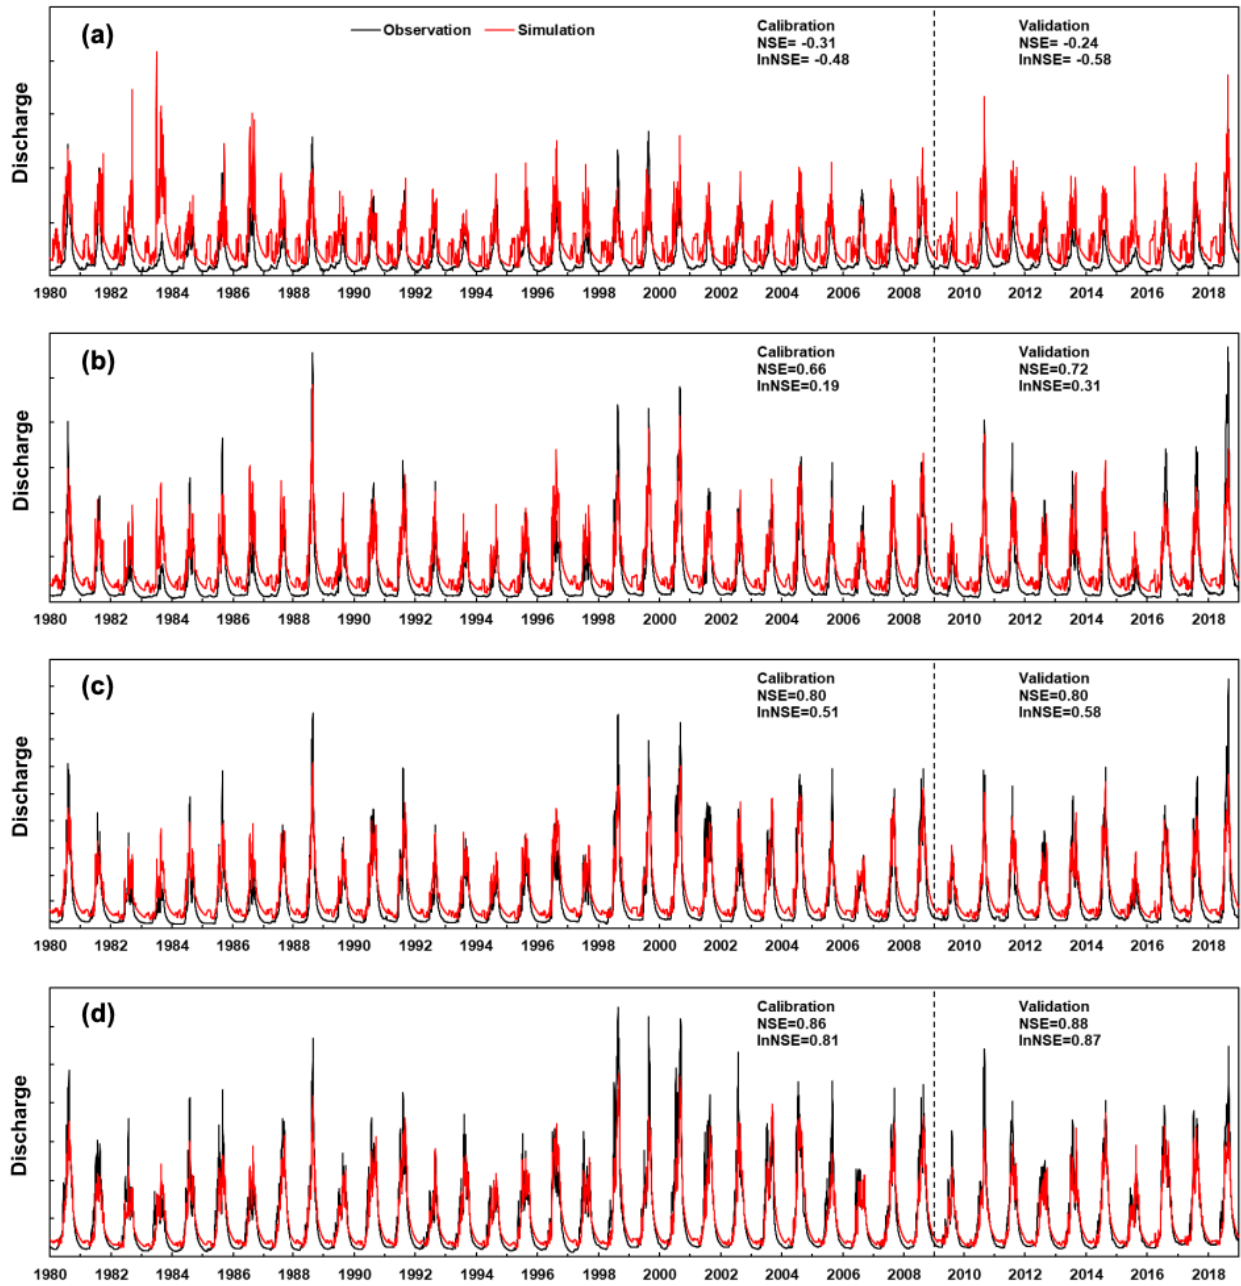

6

7 **Figure S2** Annual discharge processes of observation and simulation at four stations in the YTR basin during 1980–2018 by calibration variant “DSG”.

8 (a)–(d) for Lazi, Nugesha, Yangcun, Nuxia station, respectively.

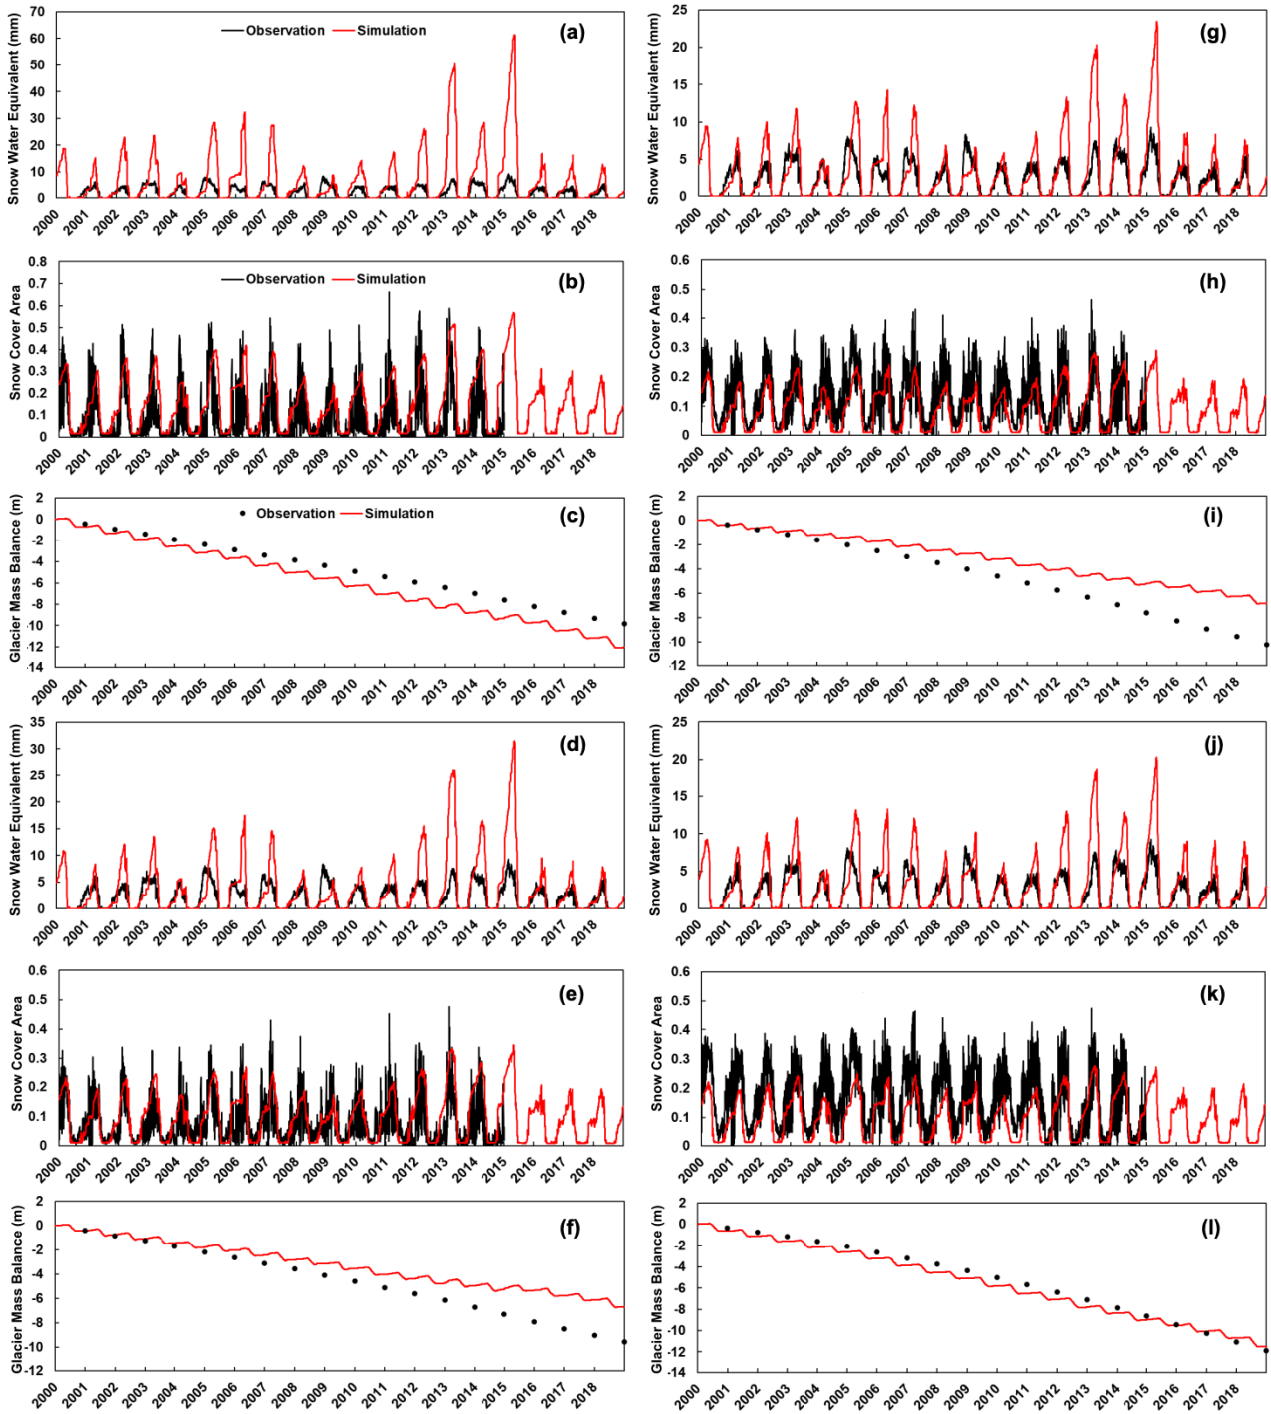

9  
 10 **Figure S3** Annual processes of SWE, SCA and GMB of observation and simulation in various regions of the YTR basin during 2000–2018 by calibration  
 11 variant “DSG”. (a–c), (d–f), (g–i) and (j–l) for the region to Lazi, Nugesha, Yangcun, Nuxia station, respectively.

12
